# Supplementary material
Source: publisher figshare collection journal article supplement (https://gsajournals.figshare.com/ndownloader/files/16840757)
Supplement: Supplementary file 1 [file 16840757]

## Sheet: Table S2
Table S2. S_CNS vs. L_CNS DEGs annotted into KEGG Pathway.
CNS ID	KO ID	KO Name	KO Description	Http Link
Cluster-13537.10511	K03283	HSPA1_8	heat shock 70kDa protein 1/8	http://www.genome.jp/dbget-bin/www_bget?ko:K03283	ko04010	MAPK signaling pathway
					ko04213	Longevity regulating pathway
					ko04612	Antigen processing and presentation
Cluster-13537.42260	K04436	MAPK8IP3, JIP3	mitogen-activated protein kinase 8 interacting protein 3	http://www.genome.jp/dbget-bin/www_bget?ko:K04436	ko04010	MAPK signaling pathway
Cluster-13537.5802	K04439	ARRB	beta-arrestin	http://www.genome.jp/dbget-bin/www_bget?ko:K04439	ko04010	MAPK signaling pathway
Cluster-13537.9453	K00128	E1.2.1.3	aldehyde dehydrogenase (NAD+)	http://www.genome.jp/dbget-bin/www_bget?ko:K00128	ko00010	Glycolysis / Gluconeogenesis
					ko01110	Biosynthesis of secondary metabolites
Cluster-13537.9271	K01110	PTEN	phosphatidylinositol-3,4,5-trisphosphate 3-phosphatase and dual-specificity protein phosphatase PTEN	http://www.genome.jp/dbget-bin/www_bget?ko:K01110	ko04068	FoxO signaling pathway
					ko04931	Insulin resistance
					ko04151	PI3K-Akt signaling pathway
Cluster-2397.0	K00430	E1.11.1.7	peroxidase	http://www.genome.jp/dbget-bin/www_bget?ko:K00430	ko00940	Phenylpropanoid biosynthesis
					ko01110	Biosynthesis of secondary metabolites
Cluster-13537.28359	K16686	SAV1, Sav	scaffold protein salvador	http://www.genome.jp/dbget-bin/www_bget?ko:K16686	ko04390	Hippo signaling pathway
Cluster-13537.45669	K05858	PLCB	phosphatidylinositol phospholipase C, beta	http://www.genome.jp/dbget-bin/www_bget?ko:K05858	ko04015	Rap1 signaling pathway
					ko04713	Circadian entrainment
					ko04911	Insulin secretion
Cluster-13537.2037		htpG, HSP90A	HSP90 family	http://www.genome.jp/dbget-bin/www_bget?ko:K04079	ko04151	PI3K-Akt signaling pathway
					ko04612	Antigen processing and presentation
Cluster-2840.0	K02128	ATPeF0C, ATP5G, ATP9	F-type H+-transporting ATPase subunit c	http://www.genome.jp/dbget-bin/www_bget?ko:K02128	ko00190	Oxidative phosphorylation
Cluster-13537.82805	K02127	ATPeF0B, ATP5F1, ATP4	F-type H+-transporting ATPase subunit b	http://www.genome.jp/dbget-bin/www_bget?ko:K02127	ko00190	Oxidative phosphorylation
Cluster-13537.11045	K02256	COX1	cytochrome c oxidase subunit 1	http://www.genome.jp/dbget-bin/www_bget?ko:K02256	ko00190	Oxidative phosphorylation
Cluster-13537.11191	K02262	COX3	cytochrome c oxidase subunit 3	http://www.genome.jp/dbget-bin/www_bget?ko:K02262	ko00190	Oxidative phosphorylation
Cluster-13537.2403	K03878	ND1	NADH-ubiquinone oxidoreductase chain 1	http://www.genome.jp/dbget-bin/www_bget?ko:K03878	ko00190	Oxidative phosphorylation
Cluster-13537.11100	K03881	ND4	NADH-ubiquinone oxidoreductase chain 4	http://www.genome.jp/dbget-bin/www_bget?ko:K03881	ko00190	Oxidative phosphorylation
Cluster-2666.0	K02941	RP-LP0, RPLP0	large subunit ribosomal protein LP0		ko03010	Ribosome
Cluster-13537.4557	KO2973	RP-S23e, RPS23	small subunit ribosomal protein S23e	http://www.genome.jp/dbget-bin/www_bget?ko:K02973	ko03010	Ribosome
Cluster-2721.0	K02998	RP-SAe, RPSA	small subunit ribosomal protein SAe	http://www.genome.jp/dbget-bin/www_bget?ko:K02998	ko03010	Ribosome
Cluster-13537.84322	K02980	RP-S29e, RPS29	small subunit ribosomal protein S29e	http://www.genome.jp/dbget-bin/www_bget?ko:K02980	ko03010	Ribosome
Cluster-2377.0	K02984	RP-S3Ae, RPS3A	small subunit ribosomal protein S3Ae	http://www.genome.jp/dbget-bin/www_bget?ko:K02984	ko03010	Ribosome
Cluster-2801.0	K02934	RP-L6e, RPL6	large subunit ribosomal protein L6e	http://www.genome.jp/dbget-bin/www_bget?ko:K02934	ko03010	Ribosome
Cluster-2347.0	K02938	RP-L8e, RPL8	large subunit ribosomal protein L8e	http://www.genome.jp/dbget-bin/www_bget?ko:K02938	ko03010	Ribosome
	DOWN regulated annotations
Cluster-13537.41892	K03781	katE, CAT, catB, srpA	catalase	http://www.genome.jp/dbget-bin/www_bget?ko:K03781	ko00630	Glyoxylate and dicarboxylate metabolism
					ko04068	FoxO signaling pathway
					ko04146	Peroxisome
					ko01110	Biosynthesis of secondary metabolites
Cluster-13537.37847	K08042	ADCY2	adenylate cyclase 2	http://www.genome.jp/dbget-bin/www_bget?ko:K08042	ko04015	Rap1 signaling pathway
					ko04922	Glucagon signaling pathway
Cluster-13537.25856	K02126	ATPeF0A, MTATP6, ATP6	F-type H+-transporting ATPase subunit a	http://www.genome.jp/dbget-bin/www_bget?ko:K02126	ko00190	Oxidative phosphorylation
Cluster-13537.32603	K03878	ND1	NADH-ubiquinone oxidoreductase chain 1	http://www.genome.jp/dbget-bin/www_bget?ko:K03878	ko00190	Oxidative phosphorylation
Cluster-13537.34703	K03879	ND2	NADH-ubiquinone oxidoreductase chain 2	http://www.genome.jp/dbget-bin/www_bget?ko:K03879	ko00190	Oxidative phosphorylation
Cluster-13537.17768	K03881	ND4	NADH-ubiquinone oxidoreductase chain 4	http://www.genome.jp/dbget-bin/www_bget?ko:K03881	ko00190	Oxidative phosphorylation
Cluster-13537.71153	COX1	COX1	cytochrome c oxidase subunit 1	http://www.genome.jp/dbget-bin/www_bget?ko:K02256	ko00190	Oxidative phosphorylation
Cluster-13537.39372	K02261	COX2	cytochrome c oxidase subunit 2	http://www.genome.jp/dbget-bin/www_bget?ko:K02261	ko00190	Oxidative phosphorylation
Cluster-13537.30171	K02262	COX3	cytochrome c oxidase subunit 3	http://www.genome.jp/dbget-bin/www_bget?ko:K02262	ko00190	Oxidative phosphorylation
Cluster-13537.52473	K12302	SLC17A6_7_8	MFS transporter, ACS family, solute carrier family 17 (sodium-dependent inorganic phosphate cotransporter), member 6/7/8	http://www.genome.jp/dbget-bin/www_bget?ko:K12302	ko04721	Synaptic vesicle cycle
Cluster-13537.60479	K00699	UGT	glucuronosyltransferase	http://www.genome.jp/dbget-bin/www_bget?ko:K00699	ko00830	Retinol metabolism
					ko01110	Biosynthesis of secondary metabolites
Cluster-13537.39887	K09113	MLX	MAX-like protein X	http://www.genome.jp/dbget-bin/www_bget?ko:K09113	ko04931	Insulin resistance
Cluster-13537.36165	k16687	YAP1, Yki	protein yorkie	http://www.genome.jp/dbget-bin/www_bget?ko:K16687	ko04390	Hippo signaling pathway
Cluster-13537.51079	K00710	GALNT	polypeptide N-acetylgalactosaminyltransferase	http://www.genome.jp/dbget-bin/www_bget?ko:K00710	ko00512	Mucin type O-glycan biosynthesis
Cluster-13537.45473	K00858	ppnK, NADK	NAD+ kinase	http://www.genome.jp/dbget-bin/www_bget?ko:K00858	ko00760	Nicotinate and nicotinamide metabolism
